# Supplementary material for: Quality Assessment of Untargeted Analytical Data in a Large-Scale Metabolomic Study
Source: MDPI journal article supplement (doi:10.3390/jcm10091826), 2021-04-22
Supplement: s1 [file s1]

| Dilution rate designation | (1)<br>MeOH<br>(uL) | (2)<br>Milli-Q<br>(uL) | (3)<br>Sample<br>(uL) |
|---------------------------|---------------------|------------------------|-----------------------|
| X10                       | 450                 | 0                      | 50                    |
| X20                       | 450                 | 25                     | 25                    |
| X39                       | 450                 | 37                     | 13                    |
| X83                       | 450                 | 44                     | 6                     |
| X167                      | 450                 | 47                     | 3                     |

Plasma dilution table

(3) Pooled plasma sample

(1) 450 uL of MeOH  
containing 20 uM of IS1  
(2) Milli-Q

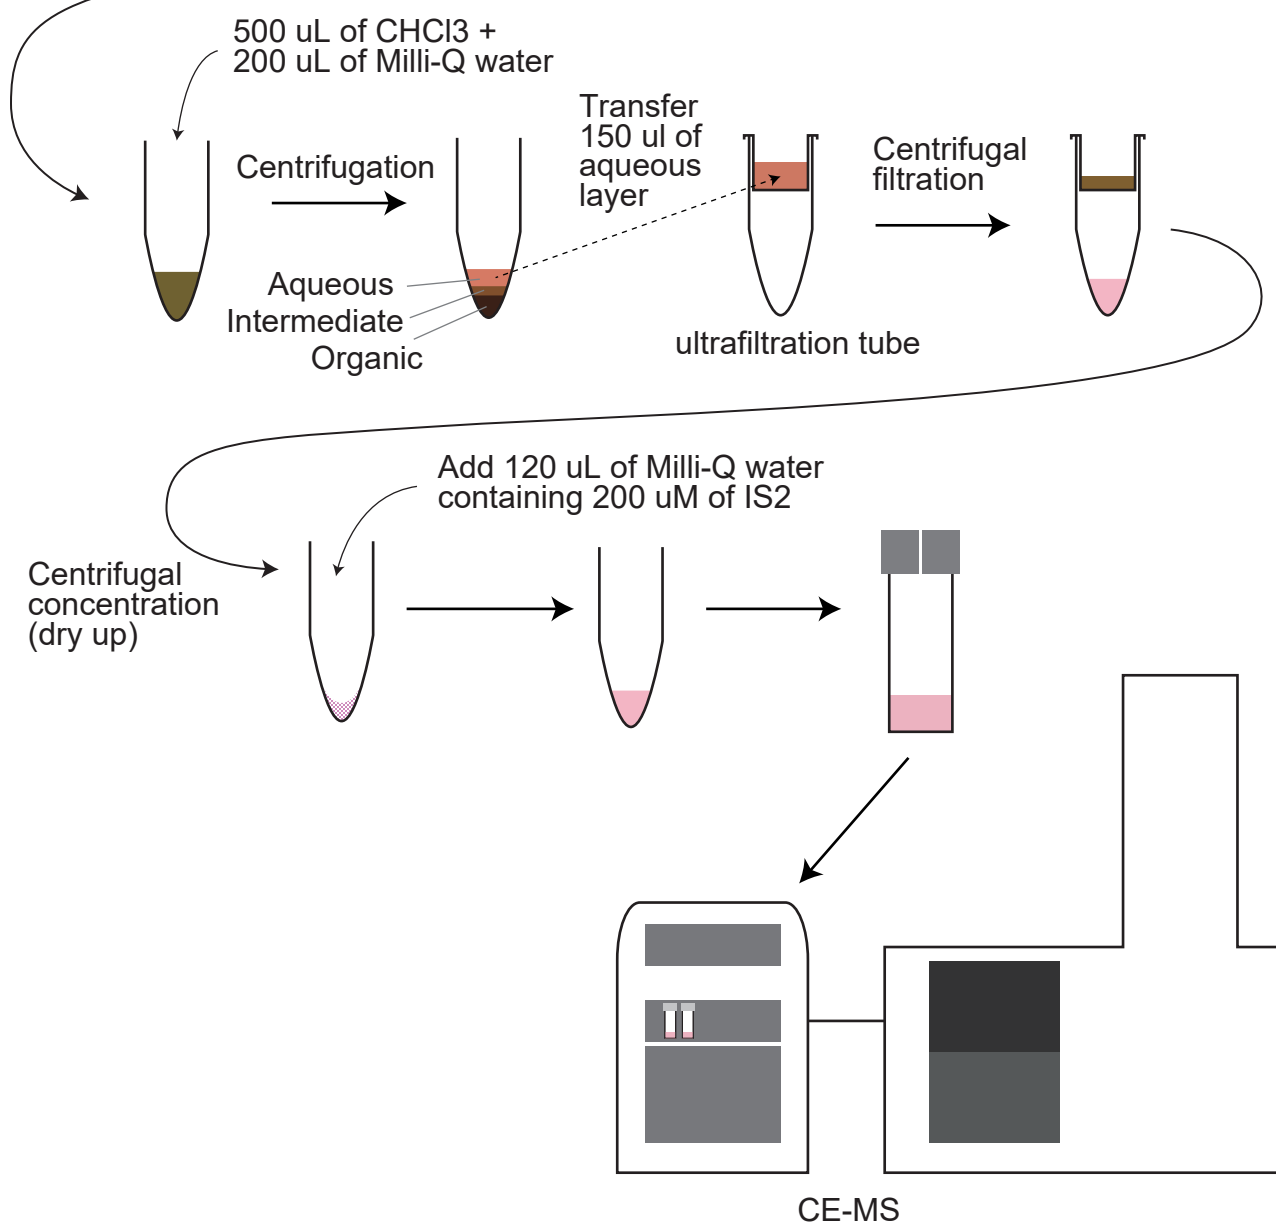

Supplemental Figure S1: Procedure used to dilute pooled plasma samples

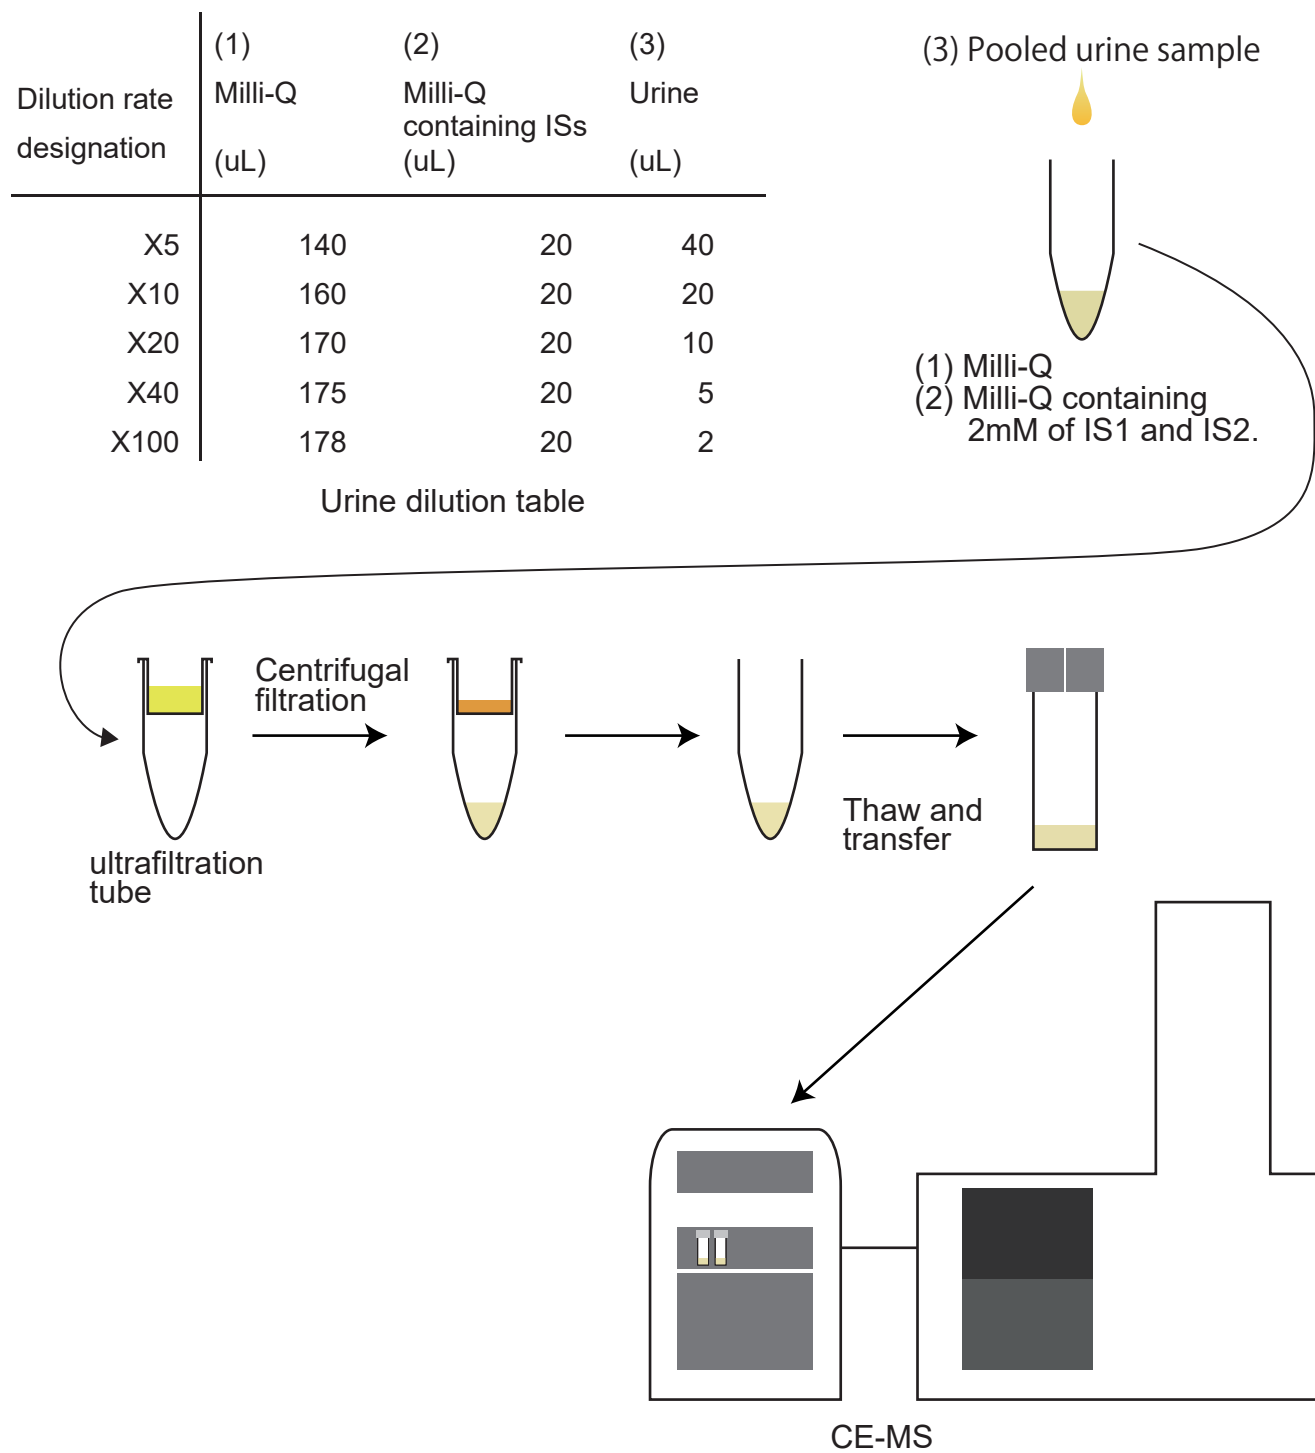

Supplemental Figure S2: Procedure used to dilute of pooled urine samples

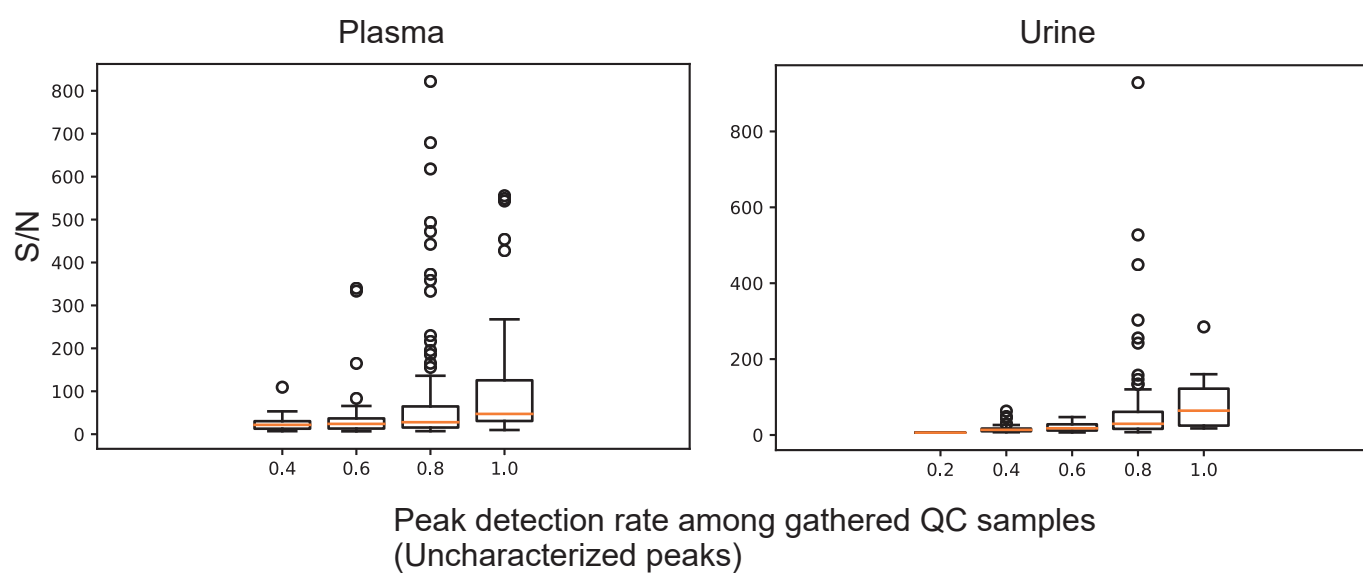

Supplemental Figure S3: Relationship between detection rates of the peaks among the gathered quality control (QC) samples and their signal-to-noise (S/N) ratios

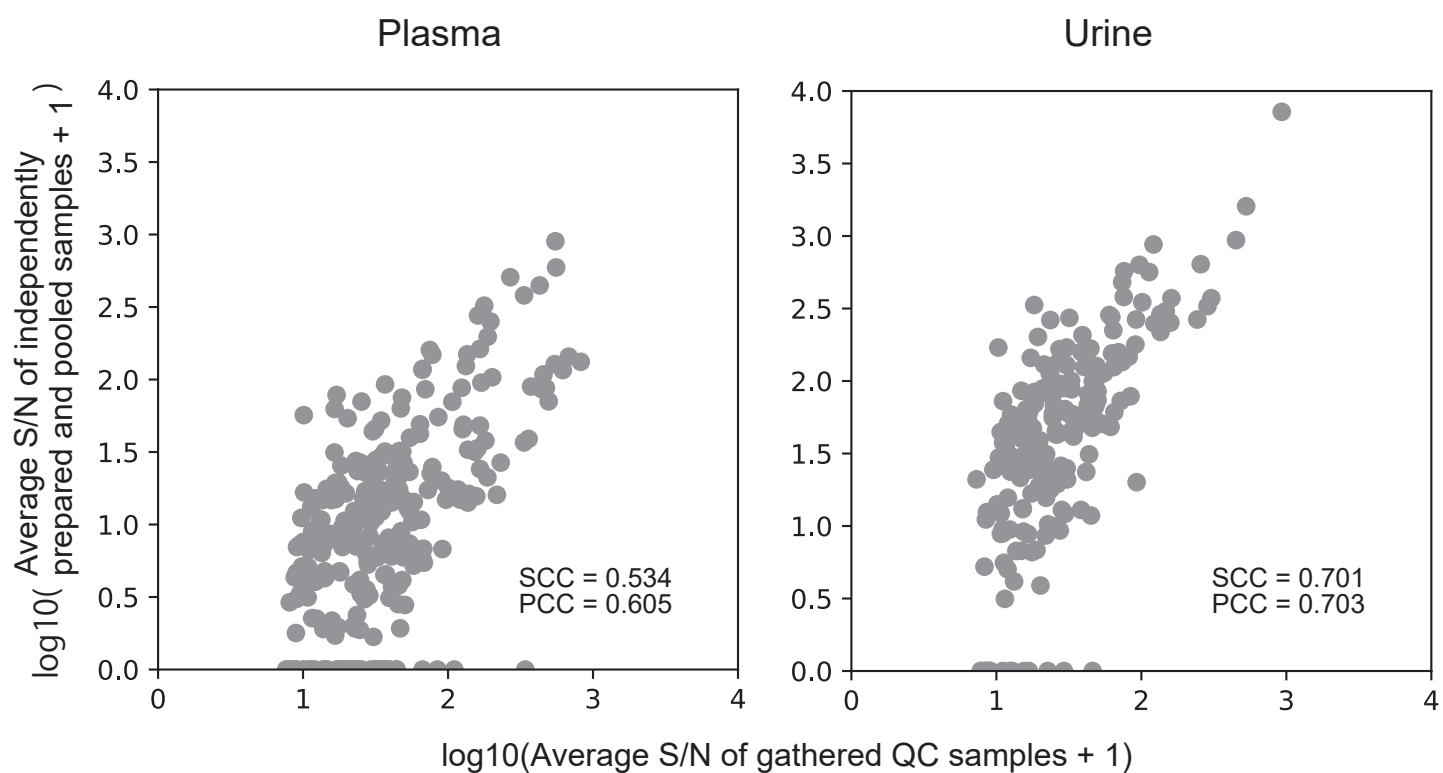

Supplemental Figure S4: Correlation between average signal-to-noise (S/N) ratios of the peaks in the gathered quality control (QC) samples and those in independently prepared and pooled samples
